# Supplementary material
Source: PubMed Central journal article supplement (PMC7204365)
Supplement: i1537-2073-22-2-91_s01.pdf [file i1537-2073-22-2-91_s01.pdf]

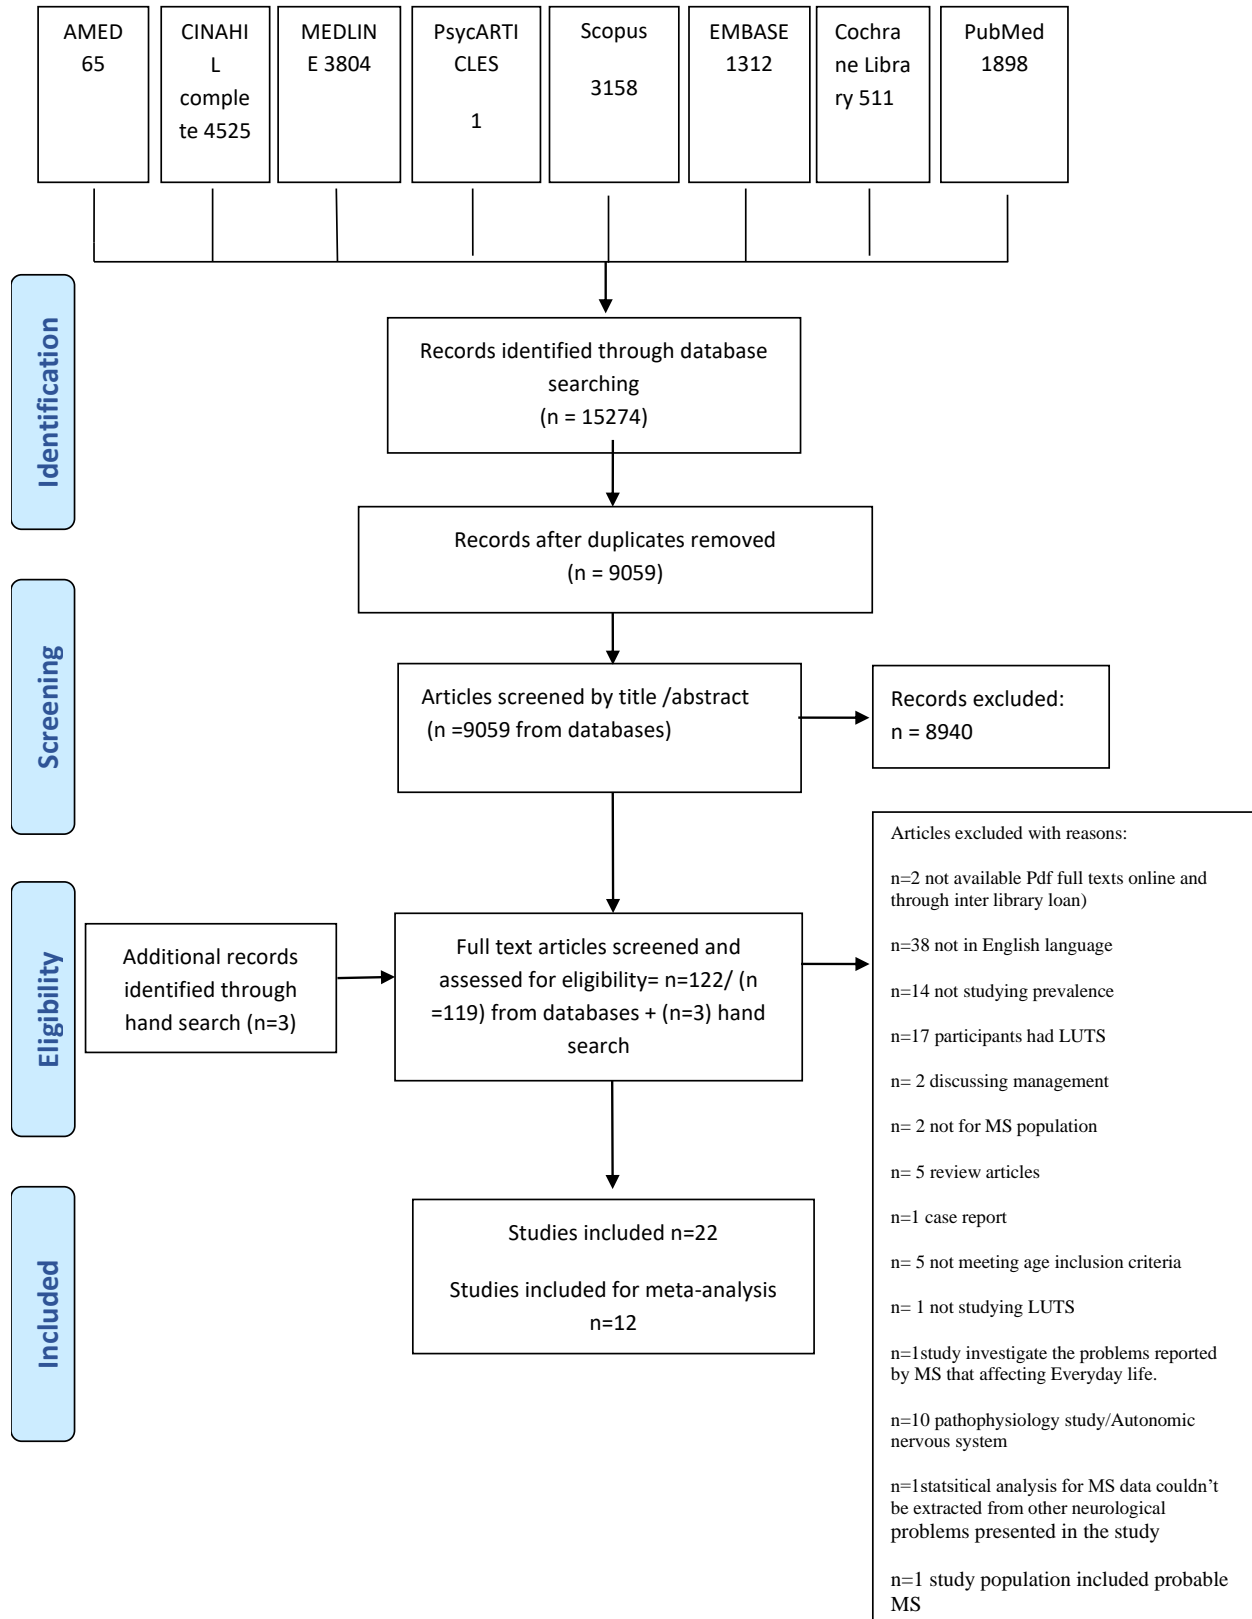

Figure S1. PRISMA flow diagram

**Figure S2. Pooled prevalence of storage symptoms using self-report measures**  
IV, inverse-variance approach that applied in RevMan.

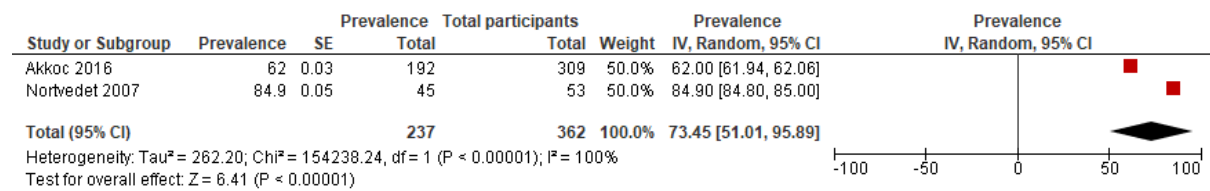

**Figure S2a. Pooled prevalence for frequency**

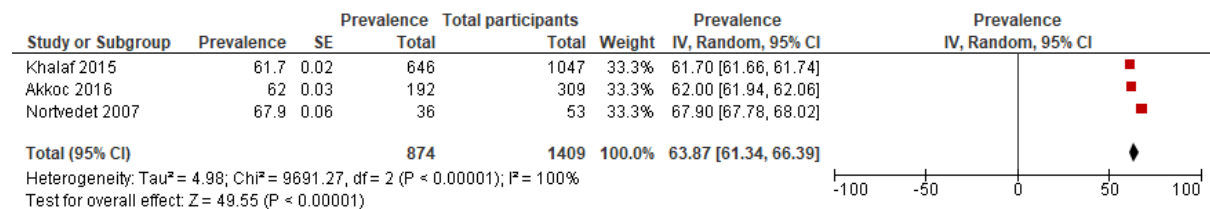

**Figure S2b. Pooled prevalence for urgency**

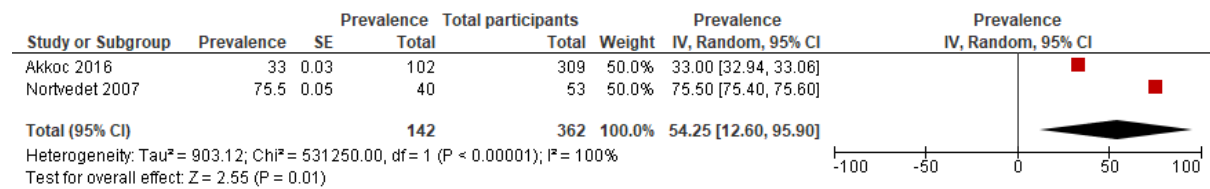

**Figure S2c. Pooled prevalence for nocturia**

**Figure S3. Pooled prevalence of storage symptoms using urodynamic studies**  
IV, inverse-variance approach that applied in RevMan.

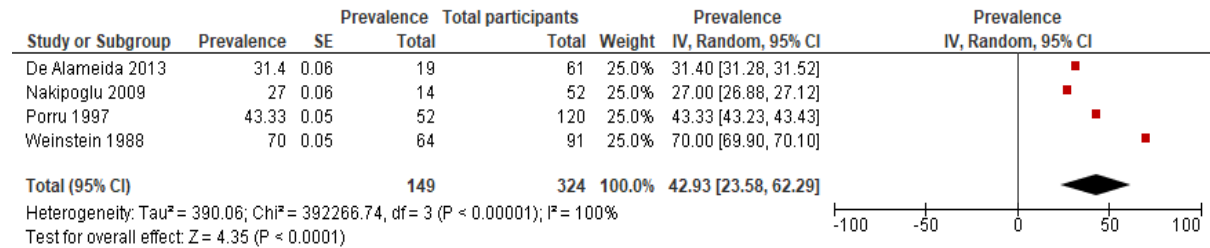

**Figure S3a. Pooled prevalence for detrusor overactivity**

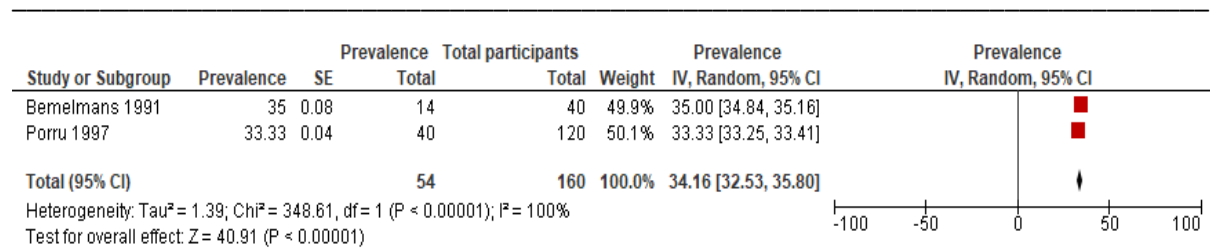

**Figure S3b. Pooled prevalence for reduced bladder sensation**

**Figure S4. Pooled prevalence of voiding symptoms using urodynamic studies**  
IV, inverse-variance approach that applied in RevMan.

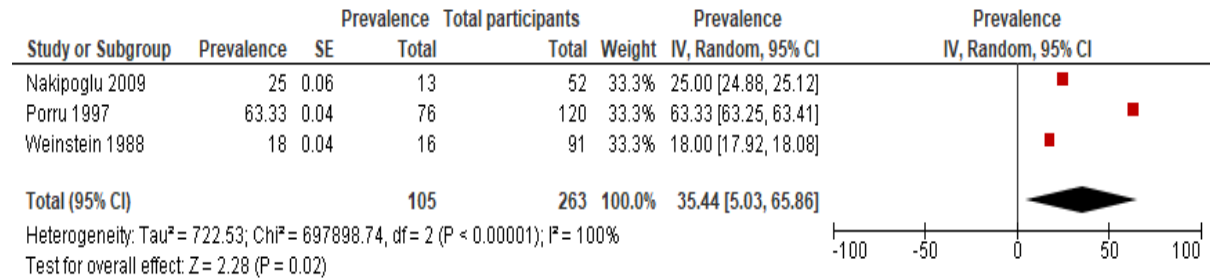

**Figure S4a. Pooled prevalence for detrusor-sphincter dyssynergia**

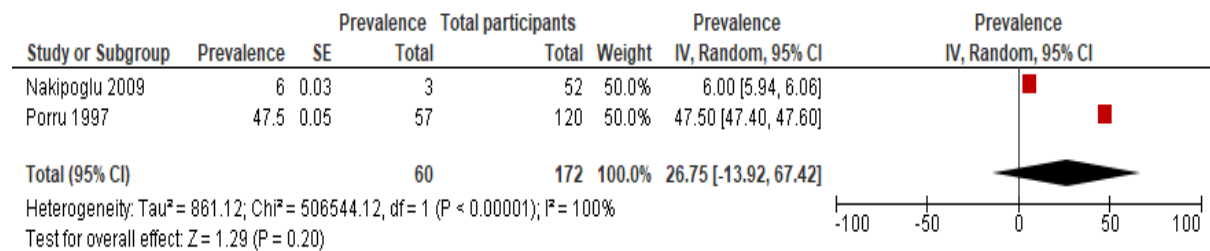

**Figure S4b. Pooled prevalence for detrusor underactivity**

**Figure S5. Pooled prevalence of postmicturition symptoms: incomplete bladder emptying using self-report measures**

IV, inverse-variance approach that applied in RevMan.

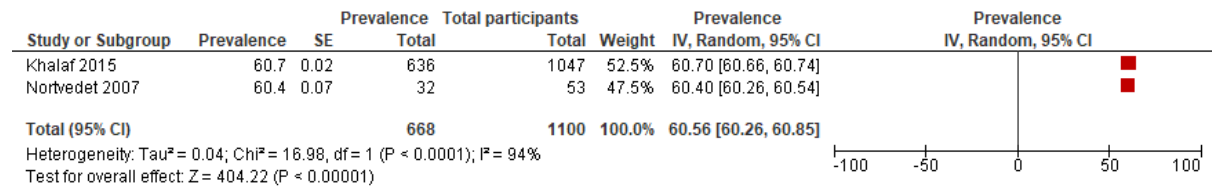

**Table S1. Descriptive characteristics of included studies**

| Author                                                                                                                                                                                                                                                                                               | Age<br>Sample size<br>Time since diagnosis                                                                                                                                                                               | Types of multiple sclerosis (MS)/disability (severity) status                                                                                                                                                              | Outcome measure used                                                  | Key findings                                                                                                                                                                                                                                                                                                                                                                                                                                                                                                                                                                                                                                                                                                                                                                                                                                                                                                                                                                           |
|------------------------------------------------------------------------------------------------------------------------------------------------------------------------------------------------------------------------------------------------------------------------------------------------------|--------------------------------------------------------------------------------------------------------------------------------------------------------------------------------------------------------------------------|----------------------------------------------------------------------------------------------------------------------------------------------------------------------------------------------------------------------------|-----------------------------------------------------------------------|----------------------------------------------------------------------------------------------------------------------------------------------------------------------------------------------------------------------------------------------------------------------------------------------------------------------------------------------------------------------------------------------------------------------------------------------------------------------------------------------------------------------------------------------------------------------------------------------------------------------------------------------------------------------------------------------------------------------------------------------------------------------------------------------------------------------------------------------------------------------------------------------------------------------------------------------------------------------------------------|
| Akkoç et al., 2016<br>Overactive bladder symptoms in patients with multiple sclerosis: Frequency, severity, diagnosis and treatment<br>Study design: Survey study cross sectional<br>Setting: Outpatient tertiary clinics (5 centers) of physical medicine and rehabilitation and neurology (Turkey) | <u>Age</u><br>Range 19-69 years<br>Mean ± SD age 39.3 ± 10.6 years<br><u>Sample size</u> 309<br>200 women, 109 men<br><u>Time since diagnosis</u><br>mean ± SD illness duration 6.9 ± 5.9 (1-30 years)                   | MS- related physical disability was evaluated by using the Patient-Determined Disease Steps (PDDS) scale                                                                                                                   | Overactive Bladder Symptom Score (OABSS)                              | Lower urinary tract symptoms (LUTS) were detected by using OABSS as follow: Urgency 62%, frequency 50.4%, urge incontinence 44.7%, nocturia 33%.<br>Urgency more common in men $P < .05$ .<br>Residual urine measurement by ultrasound was reported in 13.3% of patients; by catheter was reported in 16.2%                                                                                                                                                                                                                                                                                                                                                                                                                                                                                                                                                                                                                                                                            |
| de Almeida et al., 2013<br>Urinary dysfunction in women with multiple sclerosis: Analysis of 61 patients from Rio de Janeiro, Brazil<br>Study design: Cross sectional<br>Setting: MS neurologic clinic at Hospital da Lagoa in Rio de Janeiro, Brazil                                                | <u>Age</u><br>Mean ± SD age 41.4 ± 10.9 years<br><u>Sample size</u><br>61 females who met the McDonald criteria (2001) for MS.<br><u>Time since diagnosis</u><br>Mean MS disease duration 8 years (6 months to 27 years) | <u>Severity</u><br>Patients classified according to Expanded Disability Status Scale (EDSS)<br><u>Types</u><br>Primary-progressive MS (PPMS) in 9 patients (14.8%)<br>Relapsing-remitting MS (RRMS) in 52 patients (85.2%) | Interview + Kurtzke Functional System Scale for Bladder<br>Urodynamic | Urologic symptoms were reported by Kurtzke Functional System Scale for Bladder in: 42/61 (68.9%) among total participants<br>Urinary abnormality among total study population:<br>Urinary urgency or mild urinary retention in 18/61 (29.5%)<br>Frequent urinary incontinence (UI) in 9/61 (14.8%)<br>Intermittent urethral self-catheterization with manual compression for bladder unload 11/61 (18%)<br>Loss of bladder function in 4/61 (6.6%)<br>Normal 19/61 (31.1%)<br>Urinary symptoms recorded by urodynamics as follow:<br>Normal in 17/51 (33.3%) and abnormal findings 34/51 (66.7%) $P$ value = .001. Of those with abnormal findings the following symptoms were reported:<br>Overactive neurogenic bladder(hyperactivity) 16/51 (31.4%)<br>-Overactive neurogenic bladder with sphincter asynchrony or postvoiding residue 12/51 (23.5%)<br>Limp bladder, Hipo or No-reflex bladder 4/51 (7.8%)<br>Urethral hypermotility or bladder sphincter incompetence 2/51 (3.9%) |

|                                                                                                                                                                                                                                                                                                                                                                        |                                                                                                                                                                                                                                                                                                                             |                                                                                                                                                                                                                                                                                 |                                                                                                                                                      |                                                                                                                                                                                                                                                                                                                                                                  |
|------------------------------------------------------------------------------------------------------------------------------------------------------------------------------------------------------------------------------------------------------------------------------------------------------------------------------------------------------------------------|-----------------------------------------------------------------------------------------------------------------------------------------------------------------------------------------------------------------------------------------------------------------------------------------------------------------------------|---------------------------------------------------------------------------------------------------------------------------------------------------------------------------------------------------------------------------------------------------------------------------------|------------------------------------------------------------------------------------------------------------------------------------------------------|------------------------------------------------------------------------------------------------------------------------------------------------------------------------------------------------------------------------------------------------------------------------------------------------------------------------------------------------------------------|
| <p>Kale et al., 2009<br/>Assessment of autonomic nervous system dysfunction in multiple sclerosis and association with clinical disability<br/>Study design: Cross sectional<br/><br/>Setting: carried out in the MS Clinic of the Department of Neurology, Okmeydani Training and Research Hospital (Turkey)</p>                                                      | <p><u>Age</u> Mean <math>\pm</math> SD age 36 <math>\pm</math> 9 years<br/><u>Sample size</u> 100 with MS based on Poser criteria. 68 women and 32 men<br/><u>Time since diagnosis</u> Mean 7.7 <math>\pm</math> 5.5. Range 1-18 years</p>                                                                                  | <p><u>Types</u> RRMS in 77 cases (77%)<br/><br/>Secondary progressive MS (SPMS) in 23 cases (23%)<br/><br/><u>Severity</u> EDSS was used</p>                                                                                                                                    | <p>Researcher questionnaire of self-report measures—translated to Turkish—of symptoms relating to autonomic dysfunction (ANS) including bladder.</p> | <p>Bladder problems were presented in 64% of cases.</p>                                                                                                                                                                                                                                                                                                          |
| <p>Khalaf et al., 2015<br/>Lower urinary tract symptom prevalence and management among patients with multiple sclerosis.<br/>Study design: On-line survey<br/>Cross sectional<br/>Setting: Web-based patient advocacy organization: MS world, the National Multiple Sclerosis Society, and the Multiple Sclerosis Foundation (USA)</p>                                 | <p><u>Age range</u> 18-89 years mean <math>\pm</math> SD age 47.8 <math>\pm</math> 10.6 years<br/><u>Sample size</u> 1047<br/>Women, 81% of respondents<br/><u>Time since diagnosis</u> Mean <math>\pm</math> SD disease duration of MS was 8.5 <math>\pm</math> 7.7 years</p>                                              | <p><u>Types:</u><br/>RRMS reported in 836/1047 (80%)<br/>PPMS reported in 72/1047 (6.9%)<br/>SPMS reported in 55/1047 (5.2%)<br/>Progressive relapsing in 20/1047 (1.9%)<br/><u>Severity</u><br/>The PDDS</p>                                                                   | <p>For prevalence of bladder problems, the LUTS Tool, a comprehensive, self-administered questionnaire.</p>                                          | <p>LUTSs were reported in 966/1047 (92%); women 93%, and men 91%.<br/>Terminal dribble reported in 64.9%.<br/>Urgency in 61.7%<br/>Feeling of incomplete emptying in 60.7%, urge incontinence in 29%<br/>UI reported in 826/1047 (79%) classified as follow:<br/>Mixed UI (MUI) 28.3%<br/>Urgency UI (UUI) 24.3%<br/>Stress UI (SUI) 16.9%<br/>Other UI 9.4%</p> |
| <p>Khan et al., 2009<br/>Multiple sclerosis: Prevalence and factors impacting bladder and bowel function in an Australian community cohort<br/>Study design: Cross sectional<br/>Setting: Royal Melbourne Hospital, a tertiary referral center in Victoria Australia (medical record) includes patients from MS society, and public and private neurology clinics.</p> | <p><u>Age range</u> 29-65 years. Mean <math>\pm</math> SD 50 <math>\pm</math> 9 years.<br/><u>Sample size</u> 73 were included for final analysis<br/>Male (20) 27.4%, female (53) 72.6%<br/><u>Time since diagnosis</u> mean <math>\pm</math> SD disease duration 10.7 <math>\pm</math> 7.5 years<br/>Range 0-43 years</p> | <p><u>Types:</u><br/>Information provided among participants with bladder problems not all participants<br/>RRMS 24 cases (32.9%)<br/>SPMS 41 cases (56.2%)<br/>Primary Progressive PPMS 8 cases (11%)<br/><u>Severity:</u><br/>Provided for patients with bladder symptoms</p> | <p>Assessment of bladder was reported by: Postal invitation and face-to-face structured interview (questions not provided in the study)</p>          | <p>n = 73/81 who reported bladder problems (91.1%)</p>                                                                                                                                                                                                                                                                                                           |
| <p>Kisic Tepavcevic et al., 2017<br/>Bladder dysfunction in multiple sclerosis: a 6-year follow-up study</p>                                                                                                                                                                                                                                                           | <p><u>Age</u><br/>Range—60 years.</p>                                                                                                                                                                                                                                                                                       | <p><u>Types:</u><br/>The MS classification among 109 patients as</p>                                                                                                                                                                                                            | <p>For bladder dysfunction:<br/>- Face-to-face structured interview</p>                                                                              | <p>The prevalence of bladder dysfunction reported as follow:<br/>At baseline: 43/93 (46.23%)<br/>At the end of 3-year follow-up (f/u): 47/93 (50.5%)</p>                                                                                                                                                                                                         |

|                                                                                                                                                                                                       |                                                                                                                                                                                                                                                                                                                        |                                                                                                                                                                                                                                                                                                          |                                                                                                                                          |                                                                                                                                                                                                                                                                                                                                                                                                                                                                                                                                                                                                                                                                                                                                                                                                                                                                       |
|-------------------------------------------------------------------------------------------------------------------------------------------------------------------------------------------------------|------------------------------------------------------------------------------------------------------------------------------------------------------------------------------------------------------------------------------------------------------------------------------------------------------------------------|----------------------------------------------------------------------------------------------------------------------------------------------------------------------------------------------------------------------------------------------------------------------------------------------------------|------------------------------------------------------------------------------------------------------------------------------------------|-----------------------------------------------------------------------------------------------------------------------------------------------------------------------------------------------------------------------------------------------------------------------------------------------------------------------------------------------------------------------------------------------------------------------------------------------------------------------------------------------------------------------------------------------------------------------------------------------------------------------------------------------------------------------------------------------------------------------------------------------------------------------------------------------------------------------------------------------------------------------|
| <p>Study design: Longitudinal study<br/>Setting: Institute of Neurology, Clinical Center of (Serbia), Belgrade</p>                                                                                    | <p>Mean <math>\pm</math> SD 41.5 <math>\pm</math> 8.5 years<br/><u>Sample size</u><br/>93 MS patients were examined at each of the three time points (at baseline and at 3 and 6 years during follow-up)<br/>Female 66, and male 27<br/><u>Time since diagnosis</u><br/>Disease duration: 9.2 <math>\pm</math> 6.5</p> | <p>follow: (no data were provided specifically for the study population of 93 cases)<br/>Relapsing remitting 73 (67.0%)<br/>Secondary progressive 29 (26.6%)<br/>Primary progressive 7 (6.4%)<br/><u>Severity:</u><br/>EDSS &lt;8 (mean <math>\pm</math> SD baseline score 4.2 <math>\pm</math> 1.6)</p> | <p>Consisting questionnaire including questions related to bladder dysfunction symptoms (not clear in the study).</p>                    | <p>At the end of 6-year f/u: 63/93 (67.74%).<br/>The prevalence of types of bladder dysfunction among MS participants reported:<br/>Urgency:<br/>At baseline: 39/93 (41.93%)<br/>At the end of 3-year f/u: 42/93 (45.16%)<br/>At the end of 6-year f/u: 55/93 (59.14%)<br/>Hesitancy:<br/>At baseline: 28/93 (30.1%)<br/>At the end of 3-year f/u: 33/93 (35.48%)<br/>At the end of 6-year f/u: 45/93 (48.39%)<br/>Urgency incontinence:<br/>At baseline: 29/93 (31.18%)<br/>At the end of 3-year f/u: 30/93 (32.25%)<br/>At the end of 6-year f/u: 36/93 (38.7%)<br/>Nocturia:<br/>At baseline: 23/93 (24.73%)<br/>At the end of 3-year f/u: 26/93 (27.96%)<br/>At the end of 6-year f/u: 36/93 (38.7%)<br/>Incomplete bladder emptying:<br/>At baseline:31/93 (33.3%)<br/>At the end of 3-year f/u: 35/93 (37.63%)<br/>At the end of 6-year f/u: 45/93 (48.39%)</p> |
| <p>Murphy et al., 2012<br/>Prevalence of stress urinary incontinence in women with multiple sclerosis<br/>Study design: Cross sectional<br/>Setting: Large dedicated MS center (outpatient) (USA)</p> | <p><u>Age</u><br/>Range, 20 to 72 years.<br/>Mean age 45.8 years<br/><u>Sample size</u><br/>143 MS patients<br/>Women<br/><u>Time since diagnosis</u><br/>Mean disease duration was 12.4 years, range 1-43 years</p>                                                                                                   | <p><u>Types:</u><br/>No information provided<br/><u>Severity:</u><br/>No information provided</p>                                                                                                                                                                                                        | <p>LUTSs were assessed by:<br/>-Urogenital Distress Inventory (UDI-6)</p>                                                                | <p>Prevalence of SUI 80/143 (55.9 %)<br/>Prevalence of UUI 101/143 (70.6%)<br/>Prevalence of MUI 64/143 (44.8%)</p>                                                                                                                                                                                                                                                                                                                                                                                                                                                                                                                                                                                                                                                                                                                                                   |
| <p>Nakipoglu et al., 2009<br/>Urinary dysfunction in multiple sclerosis<br/>Study design: Cross sectional<br/>Setting: Hospital (Turkey)</p>                                                          | <p><u>Age</u><br/>Range 20-61 years<br/>Mean <math>\pm</math> SD age 37.1 <math>\pm</math> 11.7 years<br/><u>Sample size</u><br/>52 MS patients based on McDonald criteria<br/>Women 22, 42%</p>                                                                                                                       | <p><u>Types:</u><br/>PPMS in 22/52<br/>RRMS in 18/52<br/>SPMS in 12/52<br/><u>Severity:</u><br/>Disability status of MS: Kurtzke EDSS</p>                                                                                                                                                                | <p>LUTSs were reported by:<br/>Questions (not clear in study) related to urology symptoms included in history taking<br/>Urodynamics</p> | <p>Based on history taking<br/>Frequency of urinary symptoms reported in 42 of study population 80%<br/>Urgency 65%<br/>Frequency 44%<br/>Urgency incontinence 42%<br/>Stress incontinence 17%<br/>Dysuria 13%<br/>Mixed incontinence 8%</p>                                                                                                                                                                                                                                                                                                                                                                                                                                                                                                                                                                                                                          |



|                                                                                                                                                                                                                                                           |                                                                                                                                                                                                                                                                      |                                                                                                                                                                                                           |                                                                                                      |                                                                                                                                                                                                                                                                                                                                                                                                                           |
|-----------------------------------------------------------------------------------------------------------------------------------------------------------------------------------------------------------------------------------------------------------|----------------------------------------------------------------------------------------------------------------------------------------------------------------------------------------------------------------------------------------------------------------------|-----------------------------------------------------------------------------------------------------------------------------------------------------------------------------------------------------------|------------------------------------------------------------------------------------------------------|---------------------------------------------------------------------------------------------------------------------------------------------------------------------------------------------------------------------------------------------------------------------------------------------------------------------------------------------------------------------------------------------------------------------------|
|                                                                                                                                                                                                                                                           | Men 30, 58%<br><u>Time since diagnosis</u><br>Mean $\pm$ SD disease duration 7.3 $\pm$ 6.2                                                                                                                                                                           |                                                                                                                                                                                                           |                                                                                                      | LUTSs according to urodynamic study: urodynamic abnormality was detected in 30/52 (58%) MS patients, as follow:<br>Detrusor hyperreflexia in 14/52 (27%)<br>Detrusor-sphincter dyssynergia in 13/52 (25%)<br>Detrusor hyporeflexia in 3/52 (6%)                                                                                                                                                                           |
| Nortvedt et al., 2007<br>Prevalence of bladder, bowel and sexual problems among multiple sclerosis patients two to five years after diagnosis<br>Study design: Cross sectional<br>Setting: Hordaland county, Norway.                                      | <u>Age</u><br>Range: 17-53 years (included sample 2-5 years after onset of disease)<br><u>Sample size</u><br>53 for final analysis (39 female and 14 male)<br><u>Time since diagnosis</u><br>Mean duration from onset to diagnosis of disease was 6.1 years          | <u>Types:</u><br>RRMS in 44/54 (81.5%)<br>SPMS in 5/54 (9.3%)<br>PPMS in 5/54 (9.3%)<br><u>Severity:</u><br>Disability status scale (EDSS). EDSS scores were <6.5 with mean $\pm$ SD scores 3.4 $\pm$ 1.6 | LUTSs were assessed by the Norwegian translation of the International Prostate Symptom Score (I-PSS) | The prevalence was calculated as follow:<br>Not emptying the bladder reported in 32/53 (60.4%), urinating again in <2 hours in 45/53 (84.9%), weak stream in 36/53 (67.9%), stopped and started during urination in 28/53 (52.8%), difficulty in postponing urination in 36/53 (67.9%), need to push or strain to start urination in 32/53 (60.4%), times urination during the night (one or more times) in 40/53 (75.5%) |
| Patti et al., 1997<br>Micturition disorders in multiple sclerosis patients: Neurological, neurourodynamic and magnetic resonance findings<br>Study design: Cross sectional<br>Setting: In patients at the center of MS and demyelinating diseases (Italy) | <u>Age</u><br>Mean $\pm$ SD age 35.5 $\pm$ 9.6 years, range 19-61 years<br><u>Sample size</u> 101 MS patients who met Poser criteria<br>43 males and 58 females.<br><u>Time since diagnosis</u><br>Mean $\pm$ SD disease duration was 9.7 $\pm$ 0.7, range from 0-30 | <u>Types:</u> Chronic progressive MS (CPMS) in 49/101<br><br>RRMS in 52/101<br><u>Severity:</u> Disability status was assessed by Kurtzke Disability Status Scale (DSS) and EDSS                          | LUTSs assessed by: questions related to LUTSs (no details provided in the study)                     | 75/101 had micturition disorders (31 males and 44 females). Classified as follow:<br><br>Urgency in 41/101(40.6%)<br>Hesitancy in 12/101 (11.9%)<br>Frequency in 8/101 (7.9%)<br>Incontinence in 7/101 (6.9%)                                                                                                                                                                                                             |
| Porru et al., 1997<br>Urinary tract dysfunction in multiple sclerosis: Is there a relation with disease-related parameters?<br>Study design: Cross sectional<br>Setting: OPD (Italy)                                                                      | <u>Age</u><br>Mean age was 42 years (range 22-69 years)<br><u>Sample size</u><br>120 MS patients<br><u>Time since diagnosis</u>                                                                                                                                      | <u>Types:</u><br>CPMS in 55 patients<br>Exacerbating-remitting in 65 patients<br><br><u>Severity:</u>                                                                                                     | LUTSs were assessed by<br>Not clearly stated in the study<br>Urodynamics                             | LUTSs were present in all the patients.<br>To get the prevalence we could sum the results of signs under each category of disease duration:<br>Irritative reported in 43/120<br>Obstructive reported in 83/120<br>Incontinence reported in 59/120<br>To get the prevalence for urodynamics we could sum the results:                                                                                                      |

|                                                                                                                                                                                                                                                                                                              |                                                                                                                                                                                                                                                                                      |                                                                                                                                       |                                                                     |                                                                                                                                                                                                                                                                                |
|--------------------------------------------------------------------------------------------------------------------------------------------------------------------------------------------------------------------------------------------------------------------------------------------------------------|--------------------------------------------------------------------------------------------------------------------------------------------------------------------------------------------------------------------------------------------------------------------------------------|---------------------------------------------------------------------------------------------------------------------------------------|---------------------------------------------------------------------|--------------------------------------------------------------------------------------------------------------------------------------------------------------------------------------------------------------------------------------------------------------------------------|
|                                                                                                                                                                                                                                                                                                              | Disease duration was 1-48 months in 18 patients, 49-108 months in 14 patients, 109 or more months in 88 patients.                                                                                                                                                                    | The disability status was established according to the Kurtzke EDSS                                                                   |                                                                     | Dyssynergia reported in 76/120<br>Hypersensibility reported in 21/120<br>Hyposensibility reported in 40/120<br>Hyperactivity reported in 52/120<br>Hypoactivity reported in 57/120<br>Hyperactivity + hypoactivity reported in 29/120                                          |
| Torelli et al., 2015<br>Lower urinary tract symptoms associated with neurological conditions: Observations on a clinical sample of outpatients' neurorehabilitation service<br>Study design: Cross sectional<br>Setting: Neuro-rehabilitation service, San Gerardo Hospital Monza-(Italy).<br>-retrospective | <u>Age</u><br>No data provided for MS participants. Among all participants, range age 26-81 years, mean age 68 years<br><u>Sample size</u><br>18/132 had diagnosed MS (13.6%).<br>Among all participants, women 86, men 46<br><u>Time since diagnosis</u><br>No information provided | <u>Types:</u><br>No information provided<br><u>Severity:</u><br>No information provided                                               | No sufficient details were provided                                 | Among MS cases: 6/18 patients (33.3%) presented storage urinary symptoms, of which 3/18 (16.6% of the total) with incontinence, 2/18 (11.1%) with only urgency and increased daytime urinary frequency, and 1/18 (5.5%) with both storage and voiding urinary symptoms.        |
| Ukkonen et al., 2004<br>Urodynamic findings in primary progressive multiple sclerosis are associated with increased volumes of plaques and atrophy in the central nervous system<br>Study design: Cross sectional<br>Setting: (Finland) OPD -prospective-                                                    | <u>Age</u><br>Mean $\pm$ SD age 51 $\pm$ 2 years<br><u>Sample size</u><br>24 patients<br>Women 12, men 12<br><u>Time since diagnosis</u><br>Mean $\pm$ SD MS disease duration was 12 $\pm$ 2 years                                                                                   | <u>Types:</u><br>16 patients had definite PPMS<br><u>Severity:</u><br>Disability status by EDSS with mean $\pm$ SD EDSS 5.1 $\pm$ 0.4 | Urology investigation: micturition history (questions not provided) | All patients had at least one LUTS from history taking 24/24 (100%) with bladder problems<br>Urinary symptoms<br>Urgency 20 (83%)<br>Frequency 13 (54%)<br>Nocturia 9 (38%)<br>Dysuria 0<br>Urgency incontinence 18 (75%)<br>Stress incontinence 8 (33%)<br>Hesitancy 14 (58%) |
| Ventimiglia et al., 1998<br>Disorders of micturition in neurological patients. A clinical study of 786 patients<br>Study design: Cross sectional<br>Setting: Admitted in MS center, the neurological rehabilitation services,                                                                                | <u>Age</u><br>Range 19-61 years<br><u>Sample size</u><br>MS 236/786.<br><u>Time since diagnosis</u><br>No information provided                                                                                                                                                       | <u>Types:</u><br>No information provided<br><u>Severity:</u><br>No information provided                                               | Urologic symptoms reported by: a standard questionnaire             | 144/236 (61%) reported neuro-urologic abnormalities.                                                                                                                                                                                                                           |

|                                                                                                                                                                                                                                                                                                           |                                                                                                                                                                                                                                    |                                                                                                                                    |                                                                                                                                                                  |                                                                                                                                                                     |
|-----------------------------------------------------------------------------------------------------------------------------------------------------------------------------------------------------------------------------------------------------------------------------------------------------------|------------------------------------------------------------------------------------------------------------------------------------------------------------------------------------------------------------------------------------|------------------------------------------------------------------------------------------------------------------------------------|------------------------------------------------------------------------------------------------------------------------------------------------------------------|---------------------------------------------------------------------------------------------------------------------------------------------------------------------|
| or the department of neurology of Catania University (Italy)                                                                                                                                                                                                                                              |                                                                                                                                                                                                                                    |                                                                                                                                    |                                                                                                                                                                  |                                                                                                                                                                     |
| Vieira et al., 2015<br>Prevalence of autonomic dysfunction in patients with multiple sclerosis<br>Study design: case-control study<br>Setting: MS outpatient clinic of the centro hospitalar de S. Joao (Protugal)                                                                                        | <u>Age</u><br>MS group case group<br>Age range 20-61 years<br>Median age 41 years<br><u>Sample size</u><br>103 RRMS patients who met McDonald criteria<br>32 males, 71 females.<br><u>Time since diagnosis</u><br>range 0-30 years | <u>Types:</u><br>RRMS 103<br><u>Severity:</u><br>Disability status was recorded by EDSS.<br>Score range from 0-7                   | ANSD reported by using nonvalidated Portuguese translated version of Composite Autonomic Symptom Score (COMPASS) with bladder dysfunction (3 items).             | Bladder problems in 50/103 (48.5%)                                                                                                                                  |
| Wollin et al., 2005<br>Continence: Multiple sclerosis and continence issues: an exploratory study<br>Study design: Cross sectional<br>Setting: (Australia) Postal survey within a general community                                                                                                       | <u>Age</u> Phase 1: Age range 28-83 years (mean age 49 years)<br><u>Sample size</u> 62<br><u>Time since diagnosis</u><br>No information provided                                                                                   | <u>Types:</u><br>No information provided<br><u>Severity:</u><br>No information provided                                            | Two-phase anonymous mail survey.<br>The structured questionnaire (survey) consists of information about MS status and urologic symptoms (not clear in the study) | The percentage of participants who reported continence issues 56/62 (90.3%).                                                                                        |
| Zecca et al., 2016<br>Urinary incontinence in multiple sclerosis: prevalence, severity and impact on patients' quality of life<br>Study design: Chart audit<br>Setting: Two tertiary neurological referral centers (Neurocenter of Southern Switzerland, Lugano, and University La Sapienza, Rome, Italy) | <u>Age</u> Mean $\pm$ SD 44.3 $\pm$ 11.6 years<br><u>Sample size</u> 403 patients with stable MS who met McDonald criteria. 289 (72%) women and 114 (28%) men.<br><u>Time since diagnosis</u><br>Mean 11.8 years (8.6)             | <u>Types:</u><br>RRMS in 332/403 (82.4%)<br>Progressive MS in 71/403 (17.6%)<br><u>Severity:</u><br>Disability status scale (EDSS) | Urinary symptoms: International Consultation on Incontinence Questionnaire (ICIQ)                                                                                | Among study population more than one-third of MS patients reported UI<br>According to ICIQ, Q1<br>143/403 (35%) patients of both sexes reported urine incontinence. |
| Van Poppel et al., 1983<br>Neuro-muscular dysfunction of the lower urinary tract in multiple sclerosis<br>Study design: Cross sectional<br>Setting: National MS center of Melsbroek                                                                                                                       | <u>Age</u><br>No information provided<br><u>Sample size</u><br>500 patients<br><u>Time since diagnosis:</u><br>No information provided                                                                                             | <u>Types:</u><br>No information provided<br><u>Severity:</u> No information provided                                               | Urinary symptoms reported by: unclear methodology                                                                                                                | - Urological complaints in 290/500 (58%)                                                                                                                            |

|                                                                                                                                                                                                                                                       |                                                                                                                                                                                                                                                |                                                                                                                                                                                                                                    |                                                           |                                                                                                                                                                                                                                                                 |
|-------------------------------------------------------------------------------------------------------------------------------------------------------------------------------------------------------------------------------------------------------|------------------------------------------------------------------------------------------------------------------------------------------------------------------------------------------------------------------------------------------------|------------------------------------------------------------------------------------------------------------------------------------------------------------------------------------------------------------------------------------|-----------------------------------------------------------|-----------------------------------------------------------------------------------------------------------------------------------------------------------------------------------------------------------------------------------------------------------------|
| <p>Hall et al., 2012<br/>Characteristics of persons with overactive bladder of presumed neurologic origin: results from the Boston Area Community Health (BACH) survey<br/>Study design: Cross sectional<br/>Setting: Boston, Massachusetts, USA.</p> | <p><u>Age</u><br/>No information provided<br/><u>Sample size</u><br/>21 MS patients<br/><u>Time since diagnosis</u> MS with overactive neurogenic bladder 4.6 years</p>                                                                        | <p><u>Types:</u><br/>No information provided<br/><u>Severity:</u><br/>No information provided</p>                                                                                                                                  | <p>BACH survey</p>                                        | <p>BACH survey reported 10/21 MS cases with overactive neurogenic bladder (47.6%)<br/>2 men, 8 women.</p>                                                                                                                                                       |
| <p>Hassouna et al., 1984<br/>Neurourologic correlation in multiple sclerosis<br/>Study design: retrospective study<br/>Settings: Inpatient neurology department</p>                                                                                   | <p><u>Age:</u><br/>20-71 years<br/>Mean age: 51 years<br/><u>Sample size:</u><br/>70 MS patients<br/>15 men, 55 women<br/><u>Time since diagnosis:</u><br/>1-30 years; mean: 9.6 years</p>                                                     | <p><u>Types:</u><br/>No information provided<br/><u>Severity:</u><br/>No information provided</p>                                                                                                                                  | <p>No clear methodology for urinary symptoms.</p>         | <p>Irritative symptoms: 16/70 (22.8%)<br/>Obstructive symptoms: 10/70 (14.2%)<br/>Both irritative and obstructive: 17/70 (24.2%)</p>                                                                                                                            |
| <p>Weinstein et al., 1988<br/>Carbon dioxide cystometry and postural changes in patients with multiple sclerosis<br/>Study design: cross-sectional<br/>Settings:</p>                                                                                  | <p><u>Age:</u><br/>25-76-years<br/>Mean age:48<br/><u>Sample size:</u> 91 MS<br/>72 women, 19 men<br/><u>Time since diagnosis:</u> 1-42 years; mean 15 years</p>                                                                               | <p><u>Types:</u><br/>No information provided<br/><u>Severity:</u><br/>No information provided</p>                                                                                                                                  | <p>Urodynamic</p>                                         | <p>Detrusor overactivity: 64/91 (70%)<br/>Detrusor-sphincter dyssynergia: 16/91 (18%)</p>                                                                                                                                                                       |
| <p>Bemelmans et al., 1991<br/>Evidence for early lower urinary tract dysfunction in clinically silent multiple sclerosis<br/>Study design: cross-sectional<br/>Settings: inpatient</p>                                                                | <p><u>Age:</u> 21-59 years; mean 35 years<br/><u>Sample size:</u> 40 MS, 25 women, 15 men<br/>Patients with no urinary complaints = 27 MS<br/>19 women, 8 men<br/><u>Time since diagnosis:</u><br/>0.17-15 years women, 0.17-10 years men.</p> | <p><u>Types:</u><br/>Among all participants:<br/>RRMS: 27/40<br/>CPMS: 5/40<br/>Combination: 8/40<br/><u>Severity:</u><br/>EDSS range for women all participants 1-6, mean 2.22; range for men all participants 1-7, mean 3.47</p> | <p>Subjectively, details not provided<br/>Urodynamics</p> | <p>Micturition abnormalities found in 13/40 (33%):<br/>Irritative 10/13; obstructive 7/13, and UI 1/13<br/>Urodynamic study (UDS) abnormalities = 27/40 (67.5%) as follows:<br/>Bladder hyposensitivity 14/40 (35%)<br/>Bladder hypersensitivity 6/40 (15%)</p> |

**Table S2. Prevalence of lower urinary tract symptoms based on International Continence Society classification**

|                                                         | Types of LUTS based on ICS classification                | Study                                       | Individual study estimates of prevalence | Meta-analysis (random-effect model) [ 95% confidence interval] |
|---------------------------------------------------------|----------------------------------------------------------|---------------------------------------------|------------------------------------------|----------------------------------------------------------------|
| Storage symptoms<br>Subjective outcome measures         | Frequency                                                | Akkoc <i>et al.</i> 2016 <sup>36</sup>      | 50.4%                                    | 67.65 [33.84, 101.46]                                          |
|                                                         |                                                          | Nortvedt <i>et al.</i> 2007 <sup>41</sup>   | 84.9%                                    |                                                                |
|                                                         | Urgency                                                  | Khalaf <i>et al.</i> 2015 <sup>38</sup>     | 61.7%                                    | 63.87 [61.34, 66.39]                                           |
|                                                         |                                                          | Akkoc <i>et al.</i> 2016 <sup>36</sup>      | 62%                                      |                                                                |
|                                                         |                                                          | Nortvedt <i>et al.</i> 2007 <sup>41</sup>   | 67.9%                                    |                                                                |
|                                                         | Nocturia                                                 | Akkoc <i>et al.</i> 2016 <sup>36</sup>      | 33%                                      | 54.25 [12.60, 95.90]                                           |
|                                                         |                                                          | Nortvedt <i>et al.</i> 2007 <sup>41</sup>   | 75.50%                                   |                                                                |
|                                                         | Urge incontinence                                        | Khalaf <i>et al.</i> 2015 <sup>38</sup>     | 24.3%                                    | 46.53 [20.93, 72.14]                                           |
|                                                         |                                                          | Akkoc <i>et al.</i> 2016 <sup>36</sup>      | 44.7%                                    |                                                                |
|                                                         |                                                          | Murphy <i>et al.</i> 2012 <sup>39</sup>     | 70.6%                                    |                                                                |
|                                                         | Urinary incontinence                                     | de Almeida <i>et al.</i> 2013 <sup>34</sup> | 14.80%                                   | 42.93 [5.60, 80.26]                                            |
|                                                         |                                                          | Zecca <i>et al.</i> 2016 <sup>43</sup>      | 35%                                      |                                                                |
|                                                         |                                                          | Khalaf <i>et al.</i> 2015 <sup>38</sup>     | 79%                                      |                                                                |
| Mixed incontinence                                      | Khalaf <i>et al.</i> 2015 <sup>38</sup>                  | 28.30%                                      | 36.55 [20.38, 52.72]                     |                                                                |
|                                                         | Murphy <i>et al.</i> 2012 <sup>39</sup>                  | 44.8%                                       |                                          |                                                                |
| Stress incontinence                                     | Khalaf <i>et al.</i> 2015 <sup>38</sup>                  | 16.90%                                      | 36.40 [-1.82, 74.62]                     |                                                                |
|                                                         | Murphy <i>et al.</i> 2012 <sup>39</sup>                  | 55.90%                                      |                                          |                                                                |
| Other incontinence                                      | Khalaf <i>et al.</i> 2015 <sup>38</sup>                  | 9.40%                                       | N/A                                      |                                                                |
| NOAB (neurogenic overactive bladder)                    | Hall <i>et al.</i> 2012 <sup>33</sup>                    | 47.61%                                      | N/A                                      |                                                                |
| Voiding symptoms<br>subjective outcome measures         | Intermittency                                            | Nortvedt <i>et al.</i> 2007 <sup>41</sup>   | 52.80%                                   | N/A                                                            |
|                                                         | Straining                                                | Nortvedt <i>et al.</i> 2007 <sup>41</sup>   | 60.40%                                   | N/A                                                            |
|                                                         | Terminal dribble                                         | Khalaf <i>et al.</i> 2015 <sup>38</sup>     | 64.90%                                   | N/A                                                            |
|                                                         | Slow stream                                              | Nortvedt <i>et al.</i> 2007 <sup>41</sup>   | 67.92%                                   | N/A                                                            |
| Postmicturition Symptoms<br>Subjective outcome measures | Incomplete bladder emptying                              | Khalaf <i>et al.</i> 2015 <sup>38</sup>     | 60.70%                                   | 60.56 [60.26, 60.85]                                           |
|                                                         |                                                          | Nortvedt <i>et al.</i> 2007 <sup>41</sup>   | 60.4%                                    |                                                                |
| Postmicturition Symptom<br>Objective outcome measures   | Incomplete bladder emptying (residual urine measurement) | Akkoc <i>et al.</i> 2016 <sup>36</sup>      | 13.3% (ultrasound)                       | N/A                                                            |
|                                                         |                                                          |                                             | 16.20% (catheter)                        |                                                                |

|                                        |                                  |                                             |        |                       |
|----------------------------------------|----------------------------------|---------------------------------------------|--------|-----------------------|
| Voiding symptoms<br>Urodynamic studies | Detrusor-sphincter dyssynergia   | Nakipoglu <i>et al.</i> 2009 <sup>40</sup>  | 25%    | 35.44 [5.03, 65.86]   |
|                                        |                                  | Porru <i>et al.</i> 1997 <sup>35</sup>      | 63.33% |                       |
|                                        |                                  | Weinstein <i>et al.</i> 1988 <sup>44</sup>  | 18%    |                       |
|                                        | Detrusor underactivity           | Nakipoglu <i>et al.</i> 2009 <sup>40</sup>  | 6%     | 26.75 [-13.92, 67.42] |
| Porru <i>et al.</i> 1997 <sup>35</sup> |                                  | 47.50%                                      |        |                       |
| Storage symptoms<br>Urodynamic studies | Neurogenic Detrusor overactivity | Nakipoglu <i>et al.</i> 2009 <sup>40</sup>  | 27%    | 42.93 [23.58, 62.29]  |
|                                        |                                  | de Almeida <i>et al.</i> 2013 <sup>34</sup> | 31.4%  |                       |
|                                        |                                  | Weinstein <i>et al.</i> 1988 <sup>44</sup>  | 70%    |                       |
|                                        |                                  | Porru <i>et al.</i> 1997 <sup>35</sup>      | 43.33% |                       |
|                                        | Increased bladder sensation      | Porru <i>et al.</i> 1997 <sup>35</sup>      | 17.50% | 16.25 [13.80, 18.70]  |
|                                        |                                  | Bemelmans <i>et al.</i> 1991 <sup>45</sup>  | 15%    |                       |
|                                        | Reduced bladder sensation        | Porru <i>et al.</i> 1997 <sup>35</sup>      | 33.33% | 34.16 [32.53, 35.80]  |
|                                        |                                  | Bemelmans <i>et al.</i> 1991 <sup>45</sup>  | 35%    |                       |

**Table S3. Quality assessment, Newcastle-Ottawa Scale adapted for cross-sectional studies summary sheet**

| Study                                        | Selection (maximum 5 stars)  |             |                |                                          | Comparability (maximum 2 stars)                                                                                            | Assessment of the outcome (maximum 3 stars) |                  | Stars gained |
|----------------------------------------------|------------------------------|-------------|----------------|------------------------------------------|----------------------------------------------------------------------------------------------------------------------------|---------------------------------------------|------------------|--------------|
|                                              | Representativeness of sample | Sample size | Nonrespondents | Ascertainment of exposure (risk factor): | Subjects in different outcome groups are comparable, based on study design or analysis. Confounding factors are controlled | Assessment of outcome                       | Statistical test |              |
| Akkoc <i>et al.</i> 2016 <sup>36</sup>       |                              | *           |                | **                                       | **                                                                                                                         | *                                           | *                | 7            |
| de Almeida <i>et al.</i> 2013 <sup>34</sup>  |                              | *           |                | **                                       | *                                                                                                                          |                                             | *                | 5            |
| Kale <i>et al.</i> 2009 <sup>37</sup>        | *                            | *           |                | *                                        | *                                                                                                                          | *                                           | *                | 6            |
| Khalaf <i>et al.</i> 2015 <sup>38</sup>      |                              | *           |                | **                                       | **                                                                                                                         | *                                           | *                | 7            |
| Khan <i>et al.</i> 2009 <sup>24</sup>        |                              | *           | *              |                                          | **                                                                                                                         | *                                           | *                | 6            |
| Kisic <i>et al.</i> 2017 <sup>25</sup>       |                              | *           | *              |                                          | *                                                                                                                          | *                                           | *                | 5            |
| Murphy <i>et al.</i> 2012 <sup>39</sup>      |                              | *           |                | **                                       | *                                                                                                                          | *                                           | *                | 6            |
| Nakipoglu <i>et al.</i> 2009 <sup>40</sup>   |                              | *           |                |                                          | *                                                                                                                          |                                             | *                | 3            |
| Nortvedt <i>et al.</i> 2007 <sup>41</sup>    | *                            | *           |                | **                                       | *                                                                                                                          | *                                           | *                | 7            |
| Patti <i>et al.</i> 1997 <sup>26</sup>       |                              | *           |                |                                          | *                                                                                                                          |                                             | *                | 3            |
| Porru <i>et al.</i> 1997 <sup>35</sup>       |                              | *           |                |                                          | *                                                                                                                          |                                             | *                | 3            |
| Torelli <i>et al.</i> 2015 <sup>27</sup>     |                              |             |                | *                                        |                                                                                                                            |                                             | *                | 2            |
| Ukkonen <i>et al.</i> 2004 <sup>28</sup>     |                              |             |                |                                          | **                                                                                                                         |                                             | *                | 3            |
| Van poppel <i>et al.</i> 1983 <sup>31</sup>  |                              | *           |                |                                          |                                                                                                                            |                                             |                  | 1            |
| Ventimiglia <i>et al.</i> 1998 <sup>29</sup> |                              | *           |                |                                          |                                                                                                                            | *                                           |                  | 2            |
| Vieira <i>et al.</i> 2015 <sup>42</sup>      | *                            | *           |                | **                                       | *                                                                                                                          | *                                           | *                | 7            |

|                                            |   |   |  |    |    |   |   |   |
|--------------------------------------------|---|---|--|----|----|---|---|---|
| Wollin <i>et al.</i> 2005 <sup>30</sup>    |   | * |  |    |    | * | * | 3 |
| Zecca <i>et al.</i> 2016 <sup>43</sup>     | * | * |  | ** | ** | * | * | 8 |
| Hall <i>et al.</i> 2012 <sup>33</sup>      |   |   |  | ** | *  | * | * | 5 |
| Hassouna <i>et al.</i> 1984 <sup>32</sup>  | * | * |  |    |    | * | * | 4 |
| Bemelmans <i>et al.</i> 1991 <sup>45</sup> | * |   |  |    | *  |   | * | 3 |
| Weinstein <i>et al.</i> 1988 <sup>44</sup> |   | * |  |    |    |   | * | 2 |
